# Supplementary material for: Bias-adjusted projections of snow cover over eastern Canada using an ensemble of regional climate models
Source: Copernicus journal article supplement (doi:10.5194/tc-20-333-2026), 2026-01-19
Supplement: Supplementary file 1 [file tc-20-333-2026-supplement.pdf]

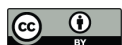

## *Supplement of*

# **Bias-adjusted projections of snow cover over eastern Canada using an ensemble of regional climate models**

**Émilie Bresson et al.**

*Correspondence to:* Émilie Bresson ([bresson.emilie@ouranos.ca](mailto:bresson.emilie@ouranos.ca))

The copyright of individual parts of the supplement might differ from the article licence.

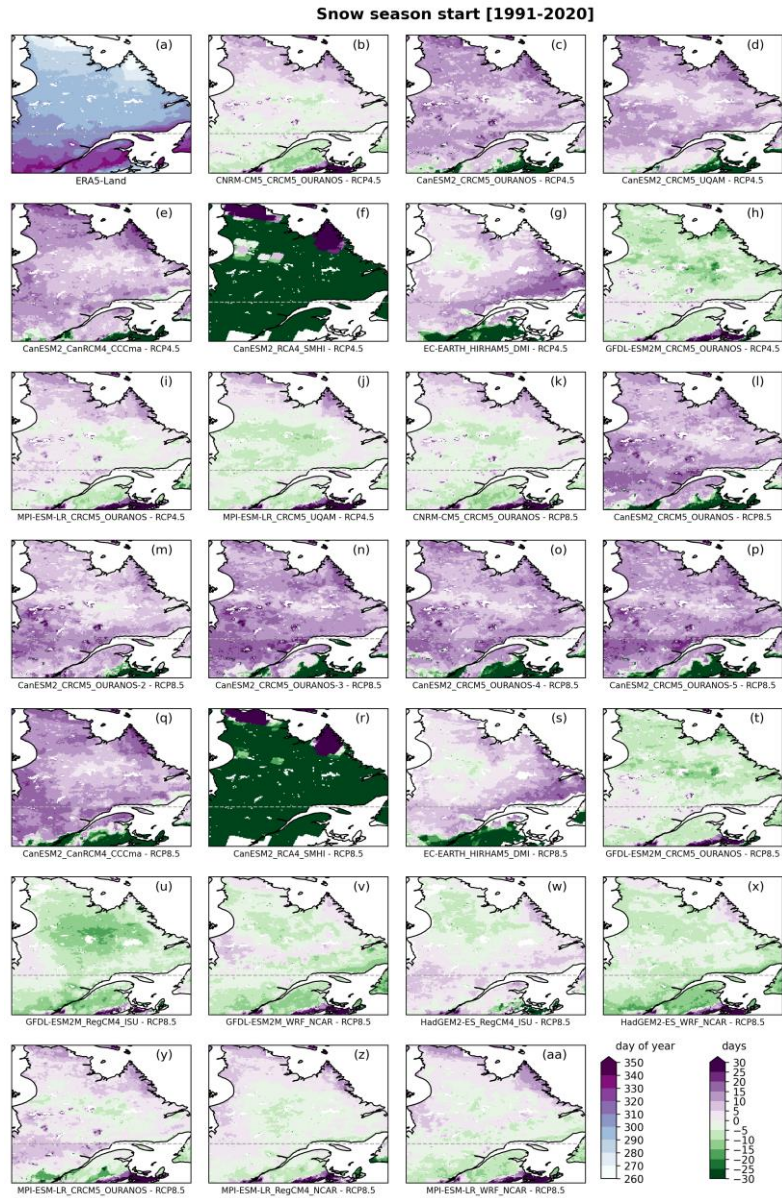

Fig. S1 Annual mean of snow season start for ERA5-Land (a) for 1991–2020. Difference between simulations and ERA5-Land annual mean of snow season start for 1991–2020 (b-aa). Results are presented for all available simulations, before applying the selection process presented in Section 2.3.2.

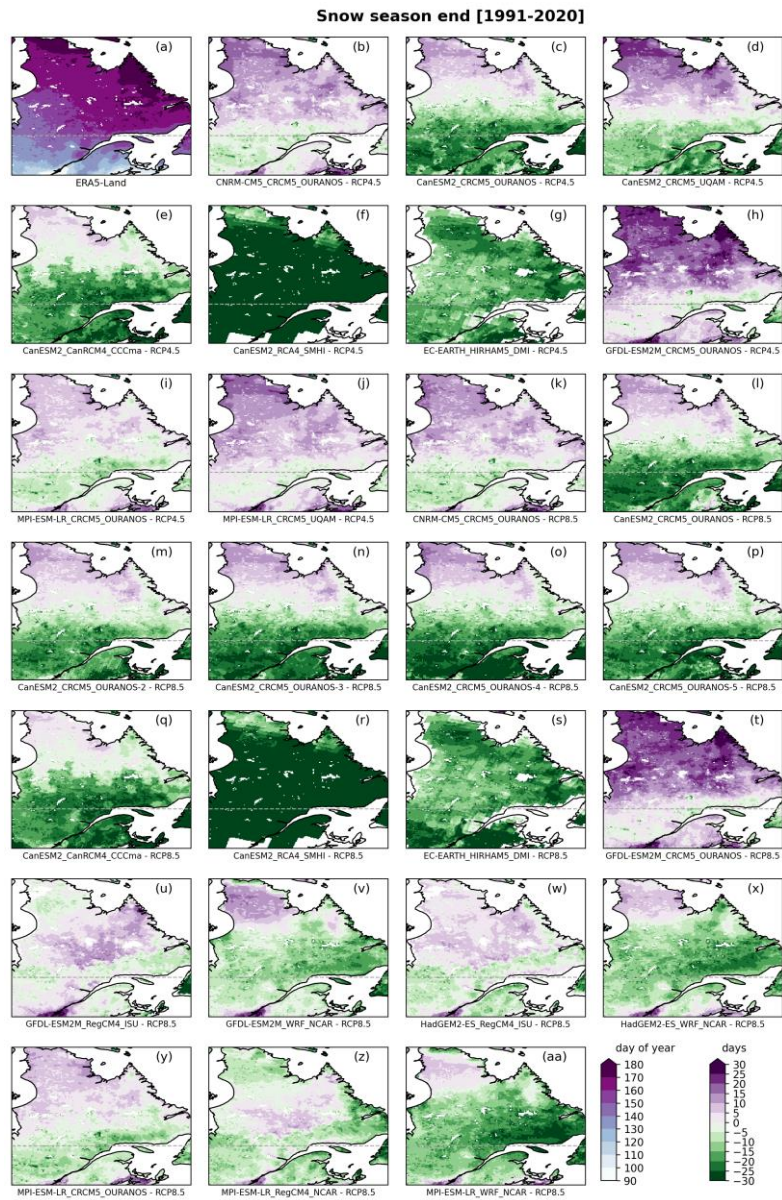

Fig. S2 Annual mean of snow season end for ERA5-Land (a) for 1991–2020. Difference between simulations and ERA5-Land annual mean of snow season end for 1991–2020 (b-aa). Results are presented for all available simulations, before applying the selection process presented in Section 2.3.2.



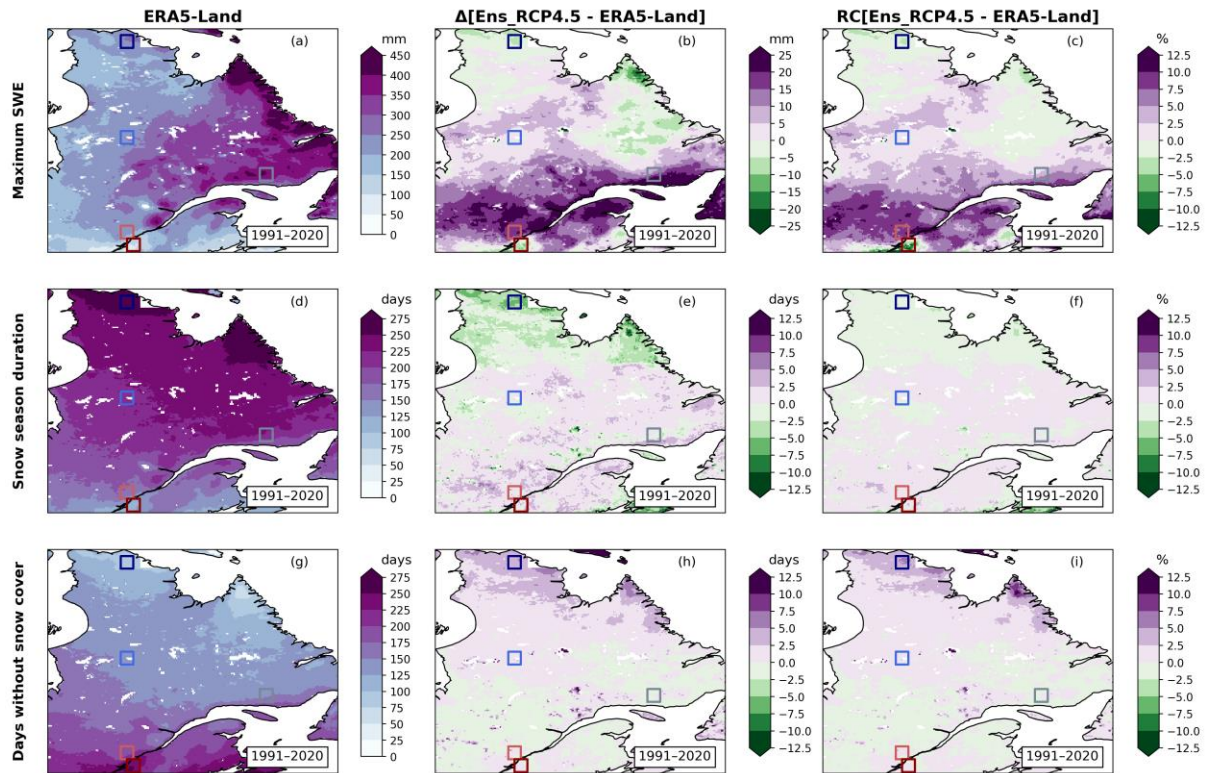

Fig. S3 Annual maximum SWE (first row), snow season duration (second row) and days without snow cover (third row) for ERA5-Land (left), difference (middle) and relative change (right) between the RCP4.5 ensemble and ERA5-Land for the 1991–2020 period

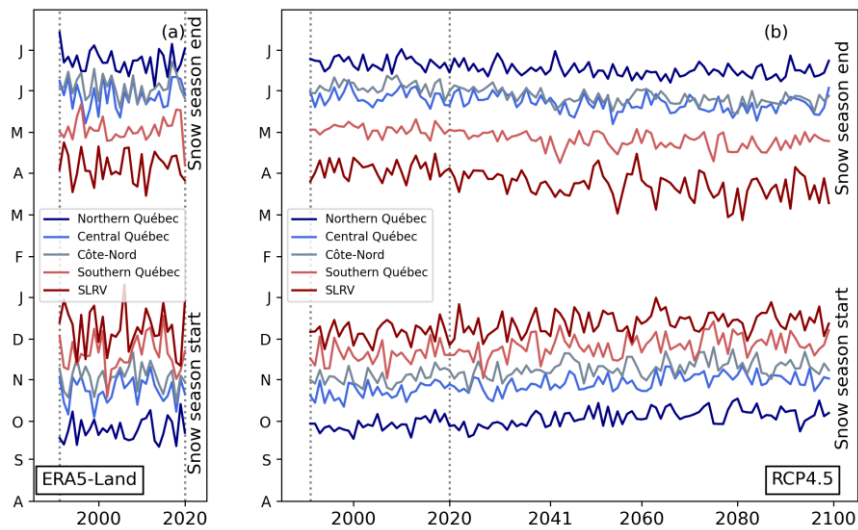

Fig. S4 Time series of snow season start (bottom) and snow season end (top) for ERA5-Land (a) and the RCP4.5 ensemble (b) for the five regions of interest. Dashed gray vertical lines encompass the historical period (1991–2020).

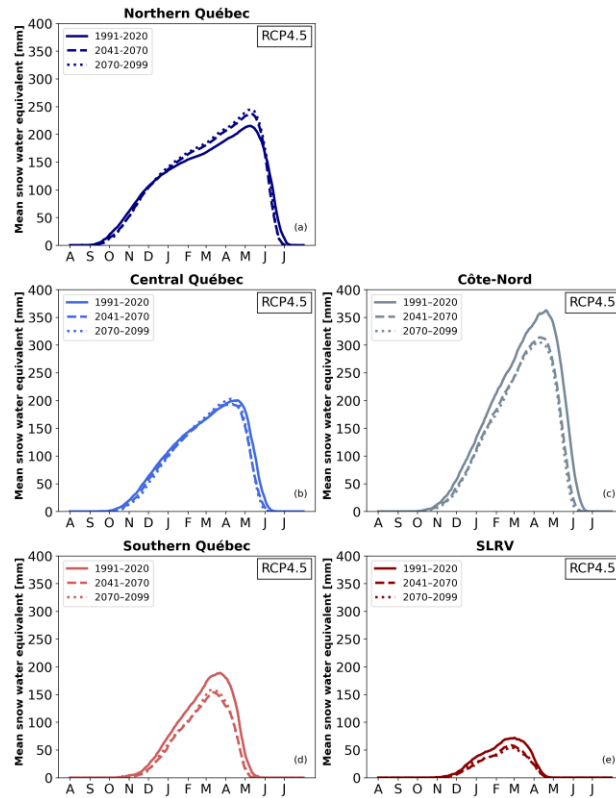

Fig. S5 Annual cycle of SWE for the RCP4.5 ensemble in the five analysis regions.

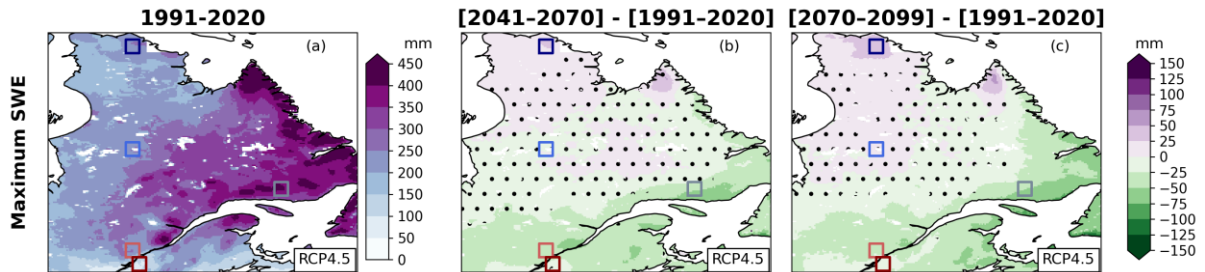

Fig. S6 Annual maximum SWE for 1991–2020 (a), and differences between the 1991–2020 period and 2041–2070 (b) or 2070–2099 (c). Dotted areas are where less than 80 % of the simulations in the ensemble agree on the sign of change. Results are presented for the RCP4.5 ensemble.

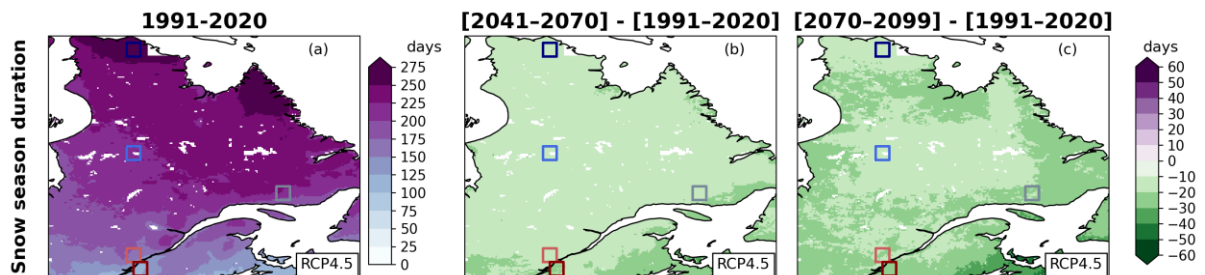

Fig. S7 Annual snow season duration for 1991–2020 (a), and differences between the 1991–2020 period and 2041–2070 (b) or 2070–2099 (c). Dotted areas are where less than 80 % of the simulations in the ensemble agree on the sign of change. Results are presented for the RCP4.5 ensemble.

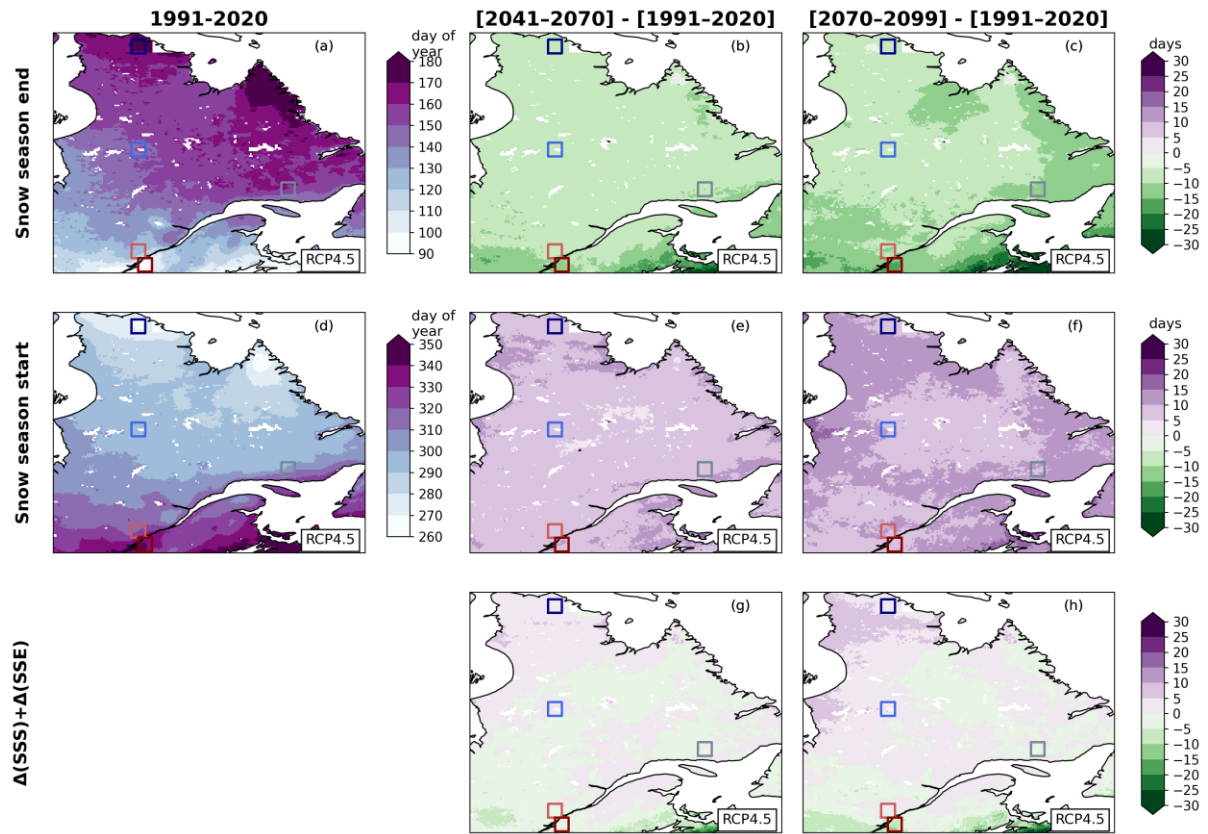

Fig. S8 Snow season end (top), snow season start (middle) and the sum of the change in timing of snow season start and change in timing of snow season end, for 1991–2020 (left), and differences between the historical period (1991–2020) and 2041–2070 (centre) and 2070–2099 (right). Results are presented for the RCP4.5 ensemble.

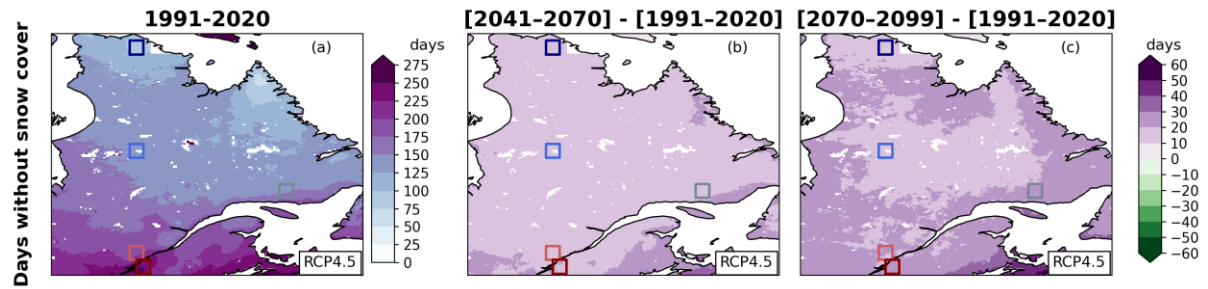

Fig. S9 Annual days without snow cover for 1991–2020 (a), and differences between the 1991–2020 period and 2041–2070 (b) or 2070–2099 (c). Dotted areas are where less than 80 % of the simulations in the ensemble agree on the sign of change. Results are presented for the RCP4.5 ensemble.



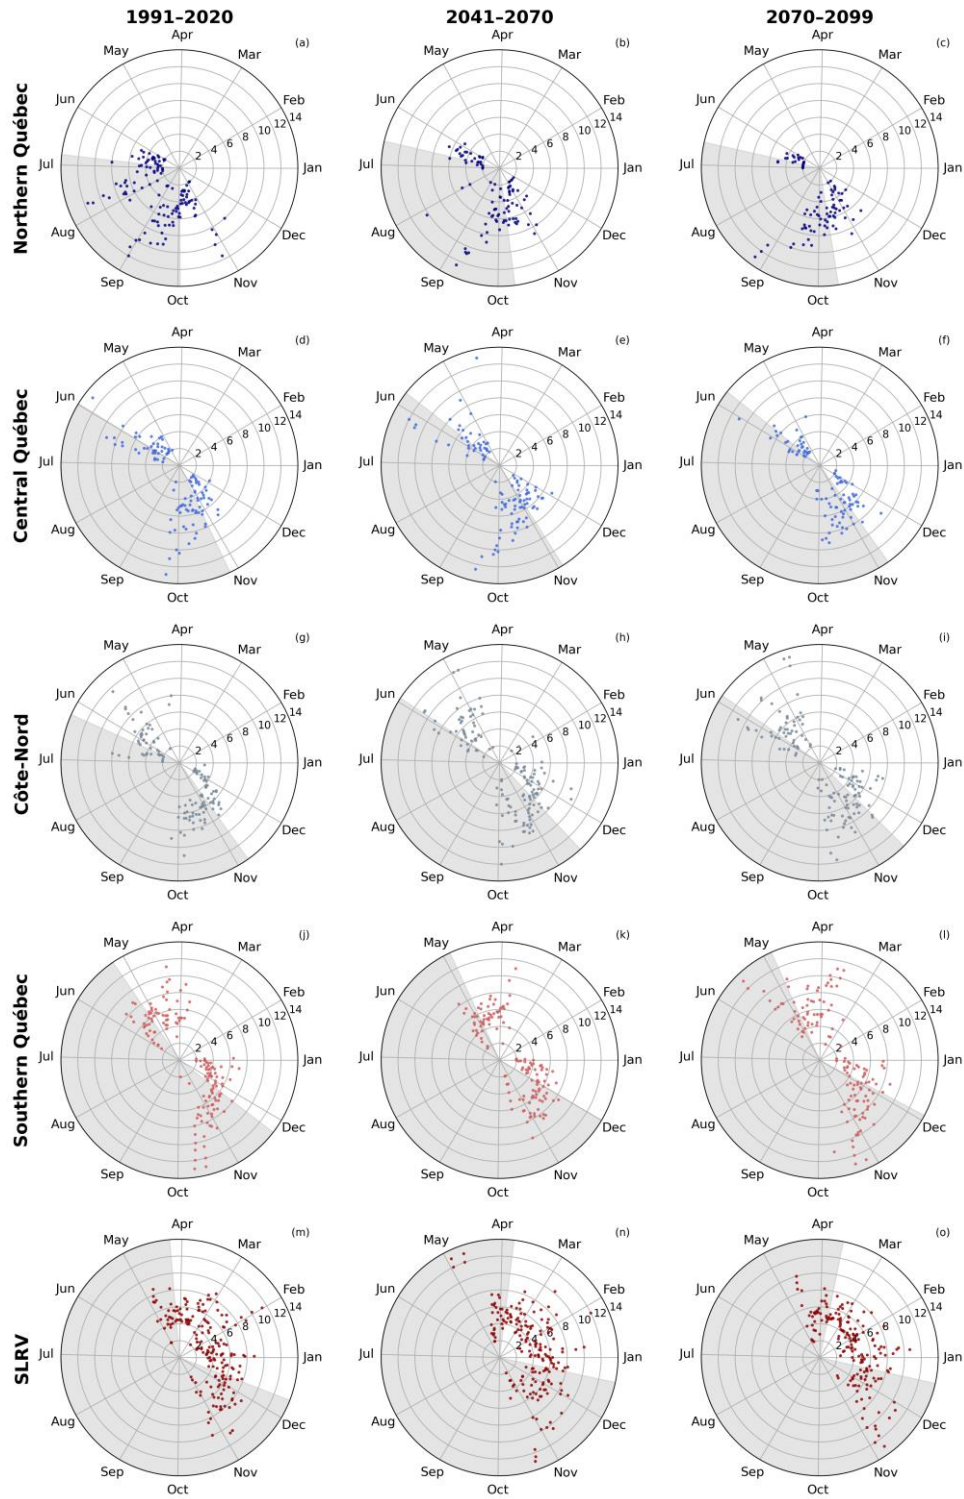

Fig. S10 Length of sequences of 2 to 13 consecutive days without snow cover (radius) as a function of the day of the year (angle) for the RCP4.5 ensemble. The white part of each figure is the mean snow season for the studied period and region. The months are labelled on the first day of the month. Results are presented per region (rows) and for 1991–2020 (left), 2041–2070 (centre) and 2070–2099 (right).

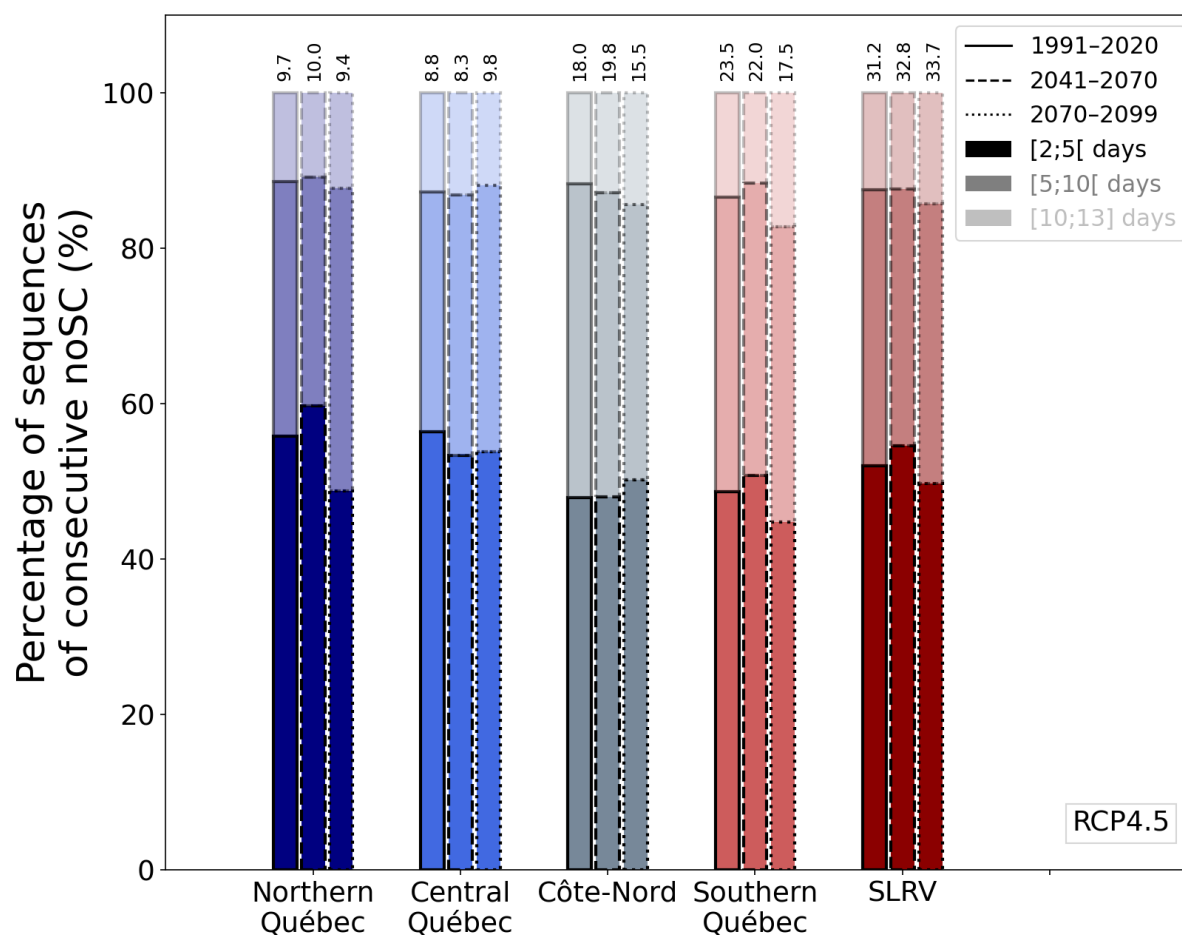

Fig. S11 Percentage of noSCseq during the snow season for the historical period 1991–2020 (lines), 2041–2070 (dashed lines) and 2070–2099 (dotted lines) for the five regions of interest. Three duration ranges are presented with different transparencies: [2;5[, [5;10[ and [10;13] consecutive days for the RCP4.5 ensemble. Values on the top of each bar correspond to the total number of noSCseq during the snow season for each region and period.



## Maximum SWE

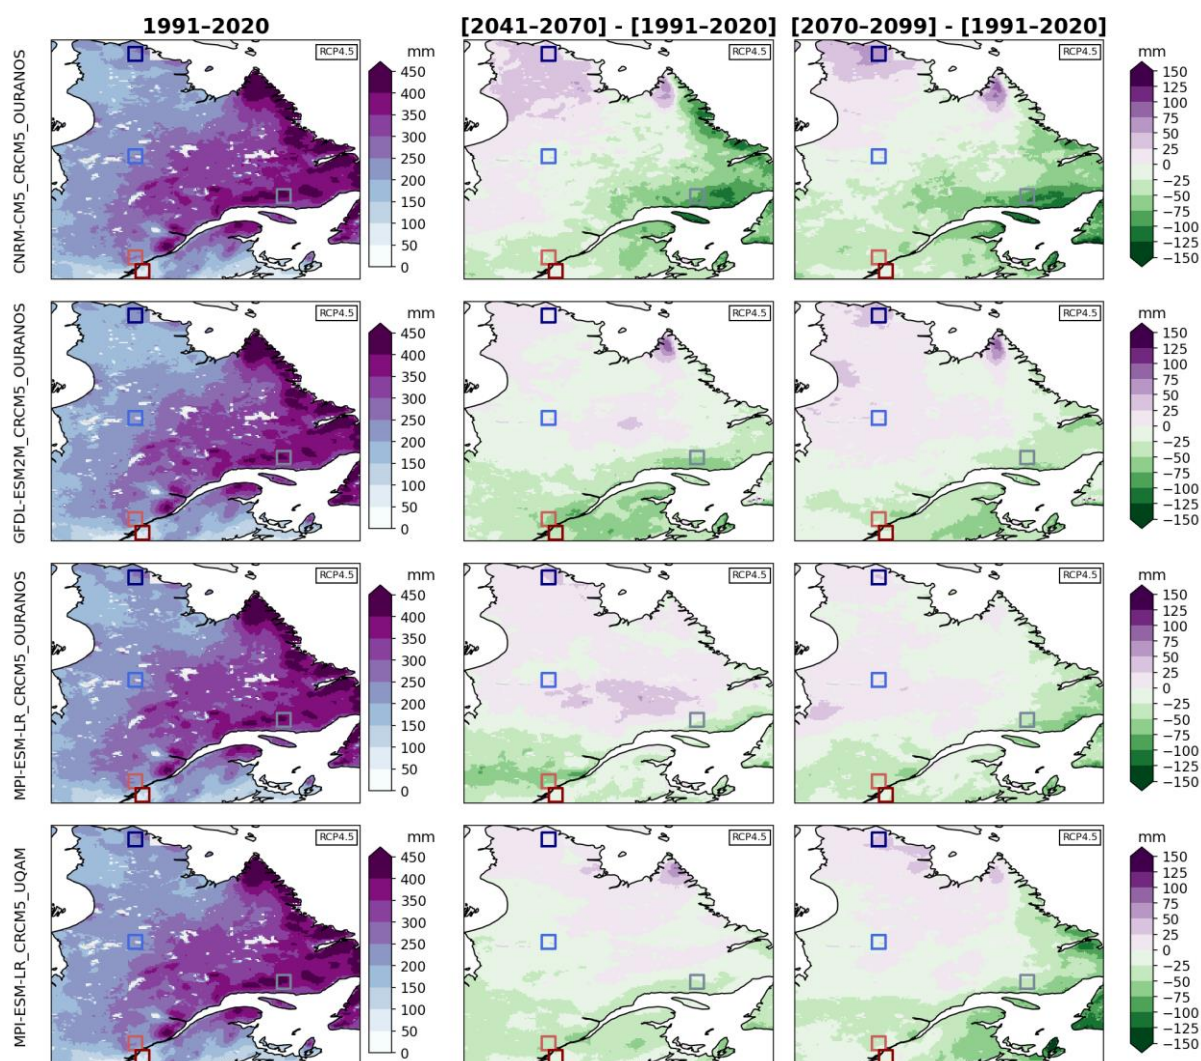

Fig. S12 Annual maximum SWE for 1991–2020 (left column), and differences between the 1991–2020 period and 2041–2070 (centre column) or 2070–2099 (right column). Results are presented for each simulation (row) of the RCP4.5 ensemble.

## Maximum SWE

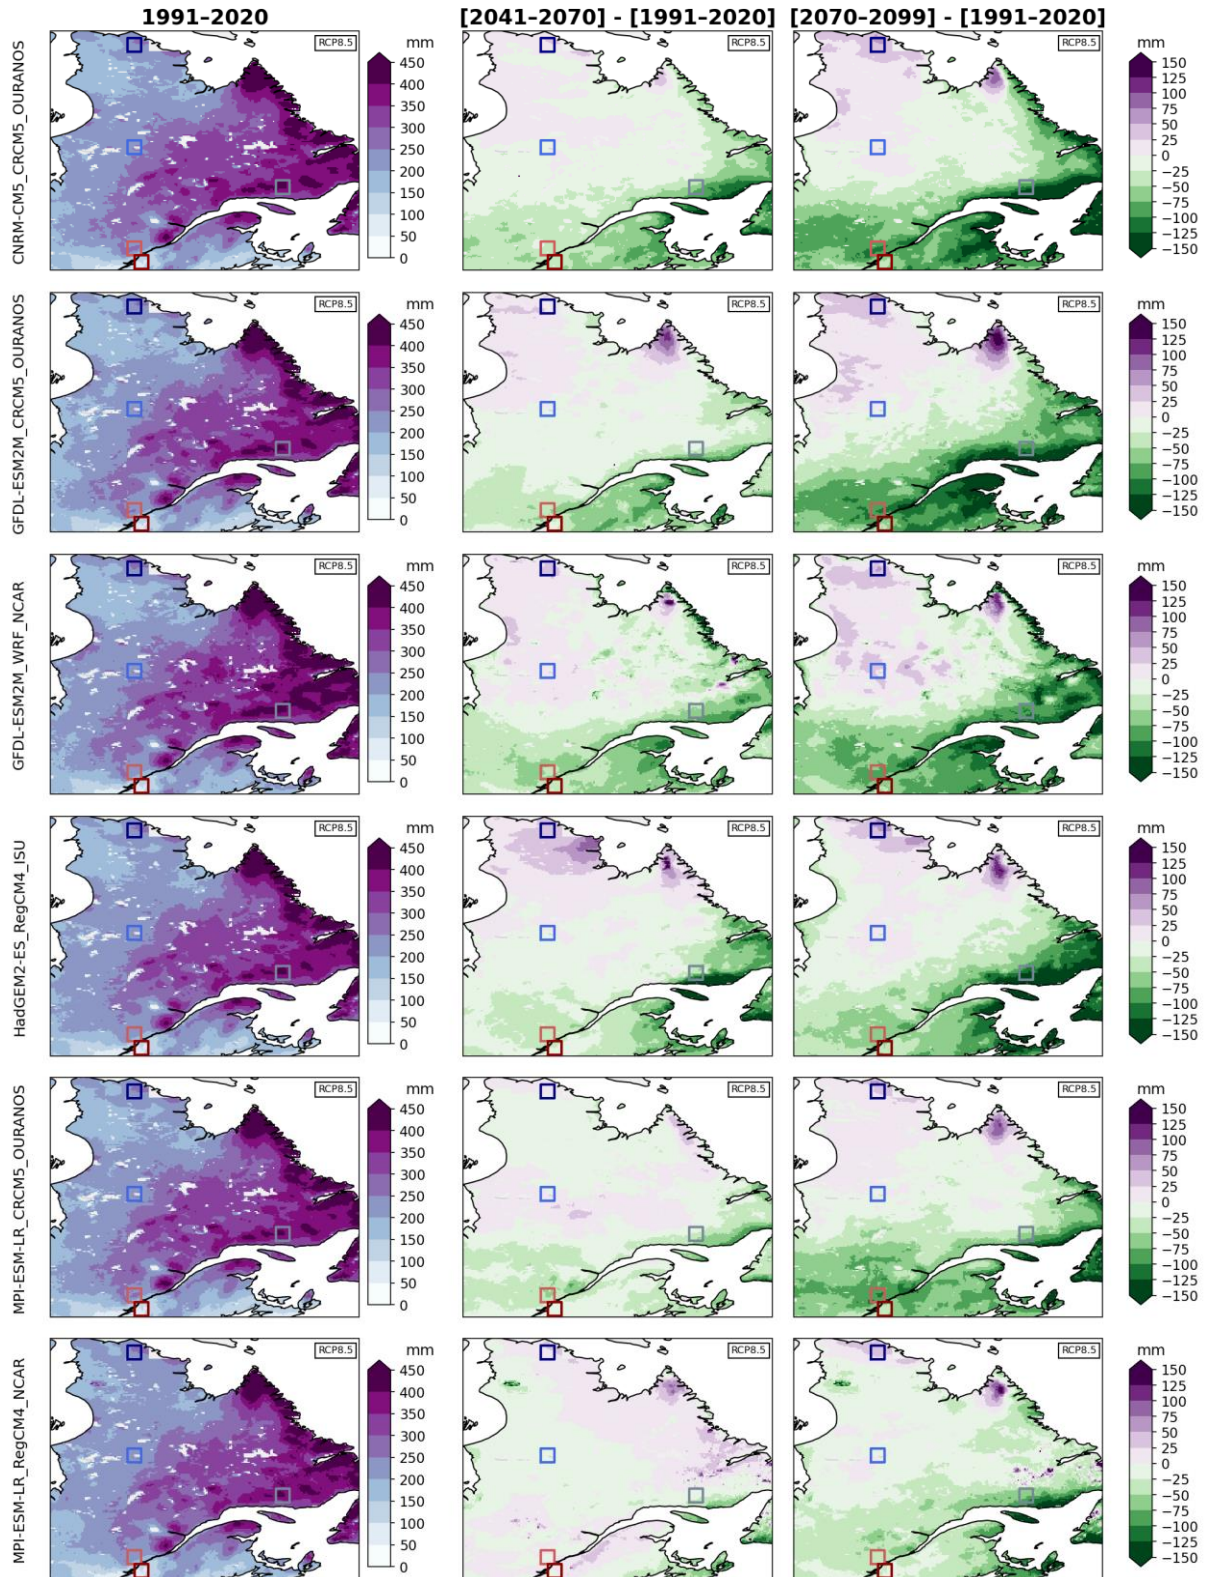

Fig. S13 Annual maximum SWE for 1991–2020 (left column), and differences between the 1991–2020 period and 2041–2070 (centre column) or 2070–2099 (right column). Results are presented for each simulation (row) of the RCP8.5 ensemble.



## Days without snow cover

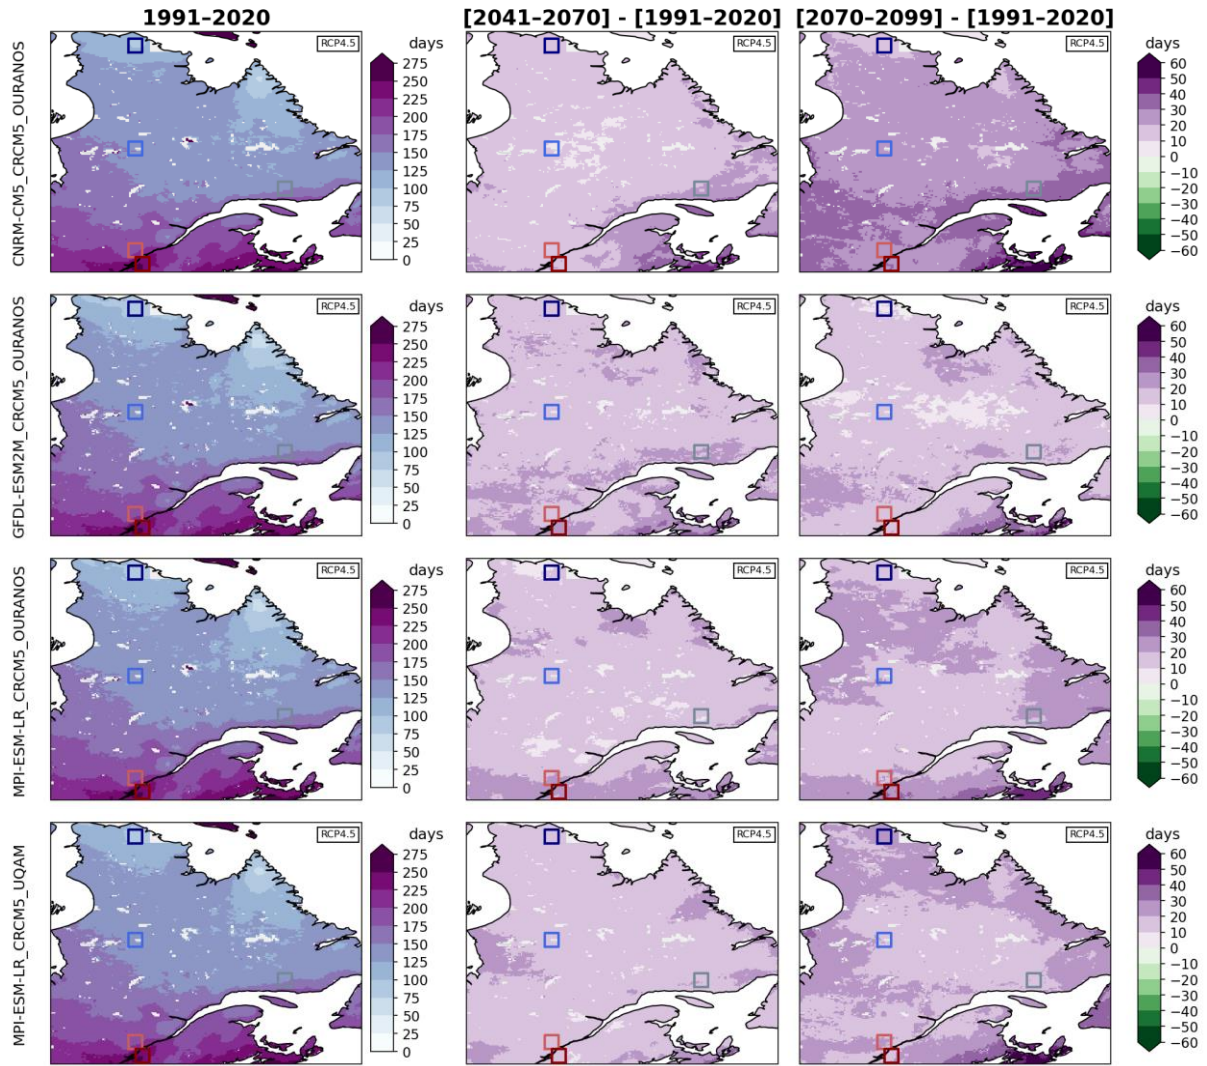

Fig. S14 Annual days without snow cover for 1991–2020 (left column), and differences between the 1991–2020 period and 2041–2070 (centre column) or 2070–2099 (right column). Results are presented for each simulation (row) of the RCP4.5 ensemble.

### Days without snow cover

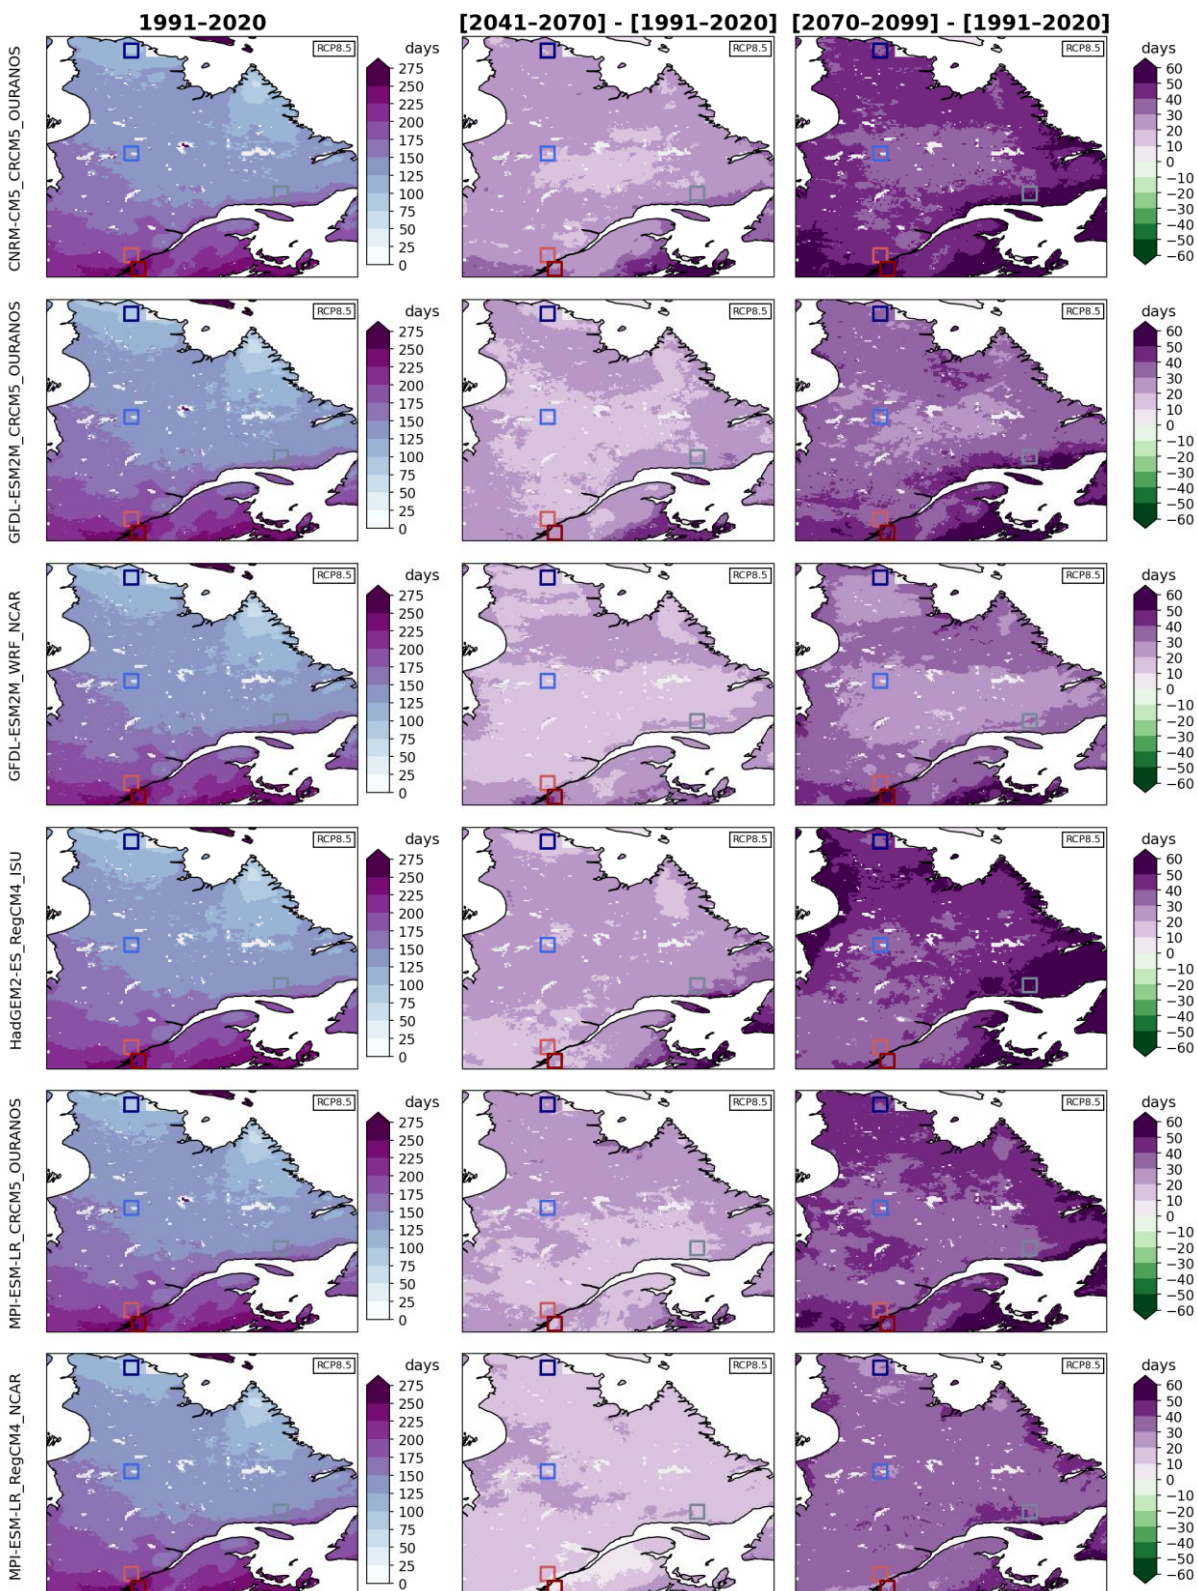

Fig. S15 Annual days without snow cover for 1991–2020 (left column), and differences between the 1991–2020 period and 2041–2070 (centre column) or 2070–2099 (right column). Results are presented for each simulation (row) of the RCP8.5 ensemble.



# **Snow season start**

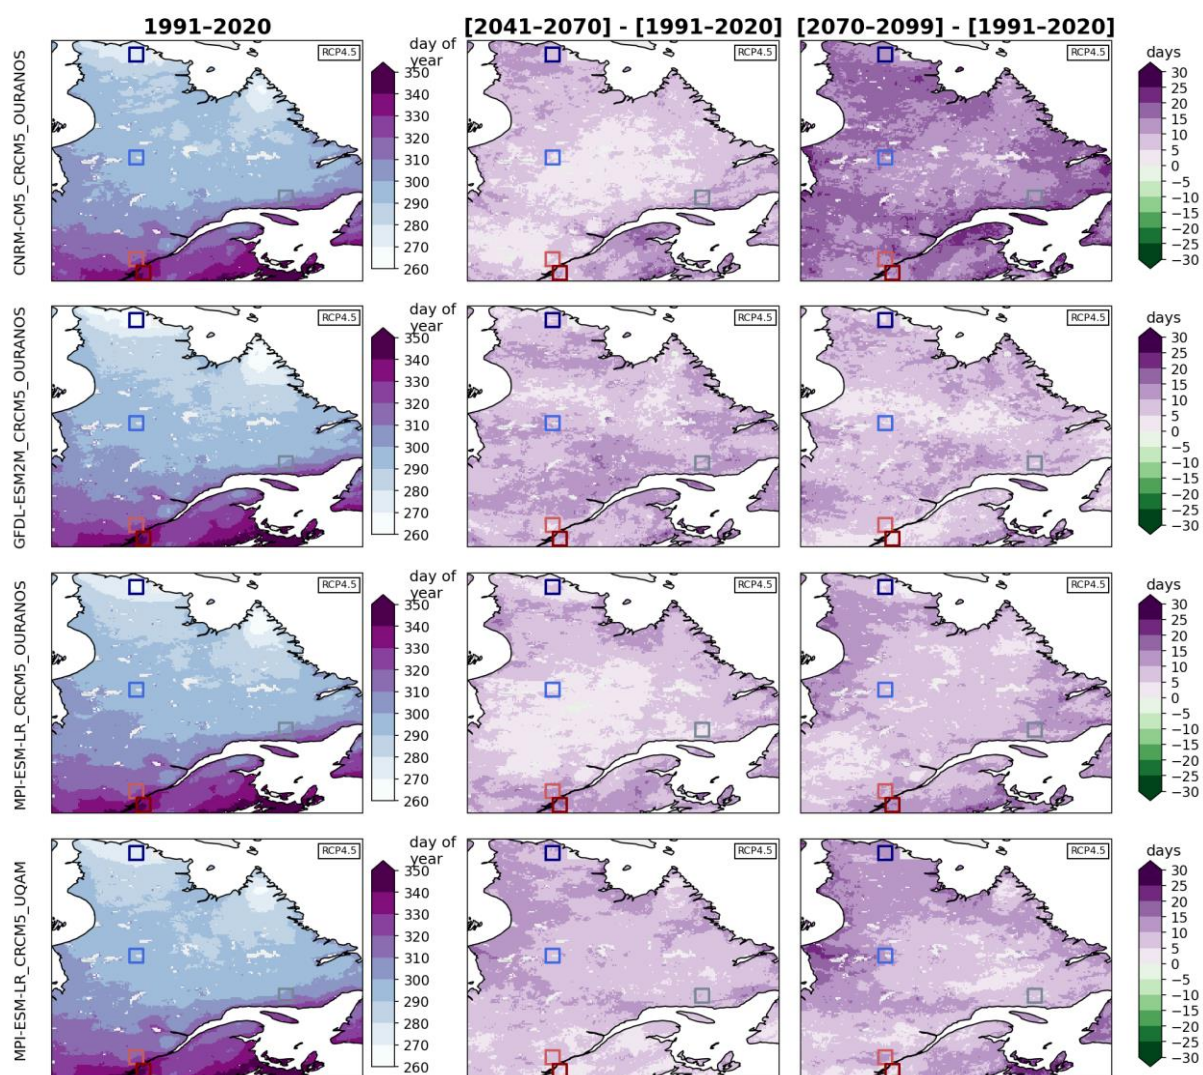

Fig. S16 Annual snow season start for 1991–2020 (left column), and differences between the 1991–2020 period and 2041–2070 (centre column) or 2070–2099 (right column). Results are presented for each simulation (row) of the RCP4.5 ensemble

# Snow season start

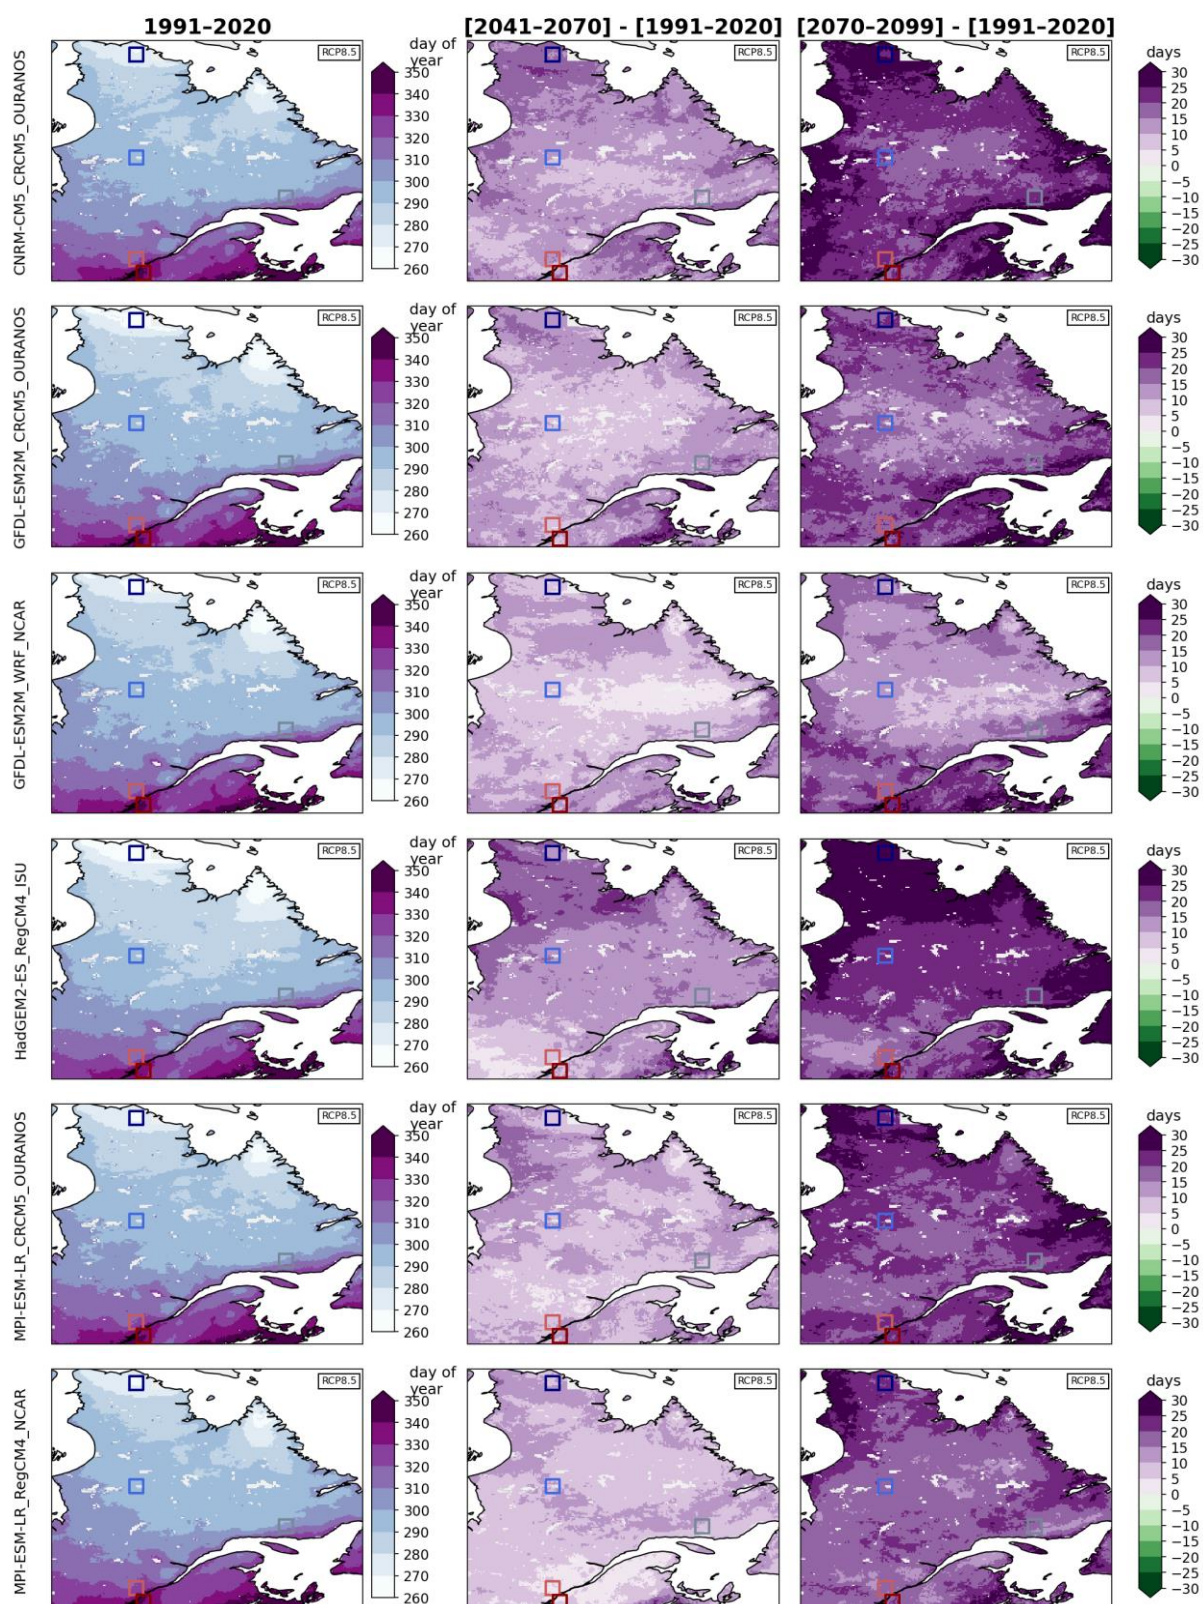

Fig. S17 Annual snow season start for 1991–2020 (left column), and differences between the 1991–2020 period and 2041–2070 (centre column) or 2070–2099 (right column). Results are presented for each simulation (row) of the RCP8.5 ensemble.



## Snow season end

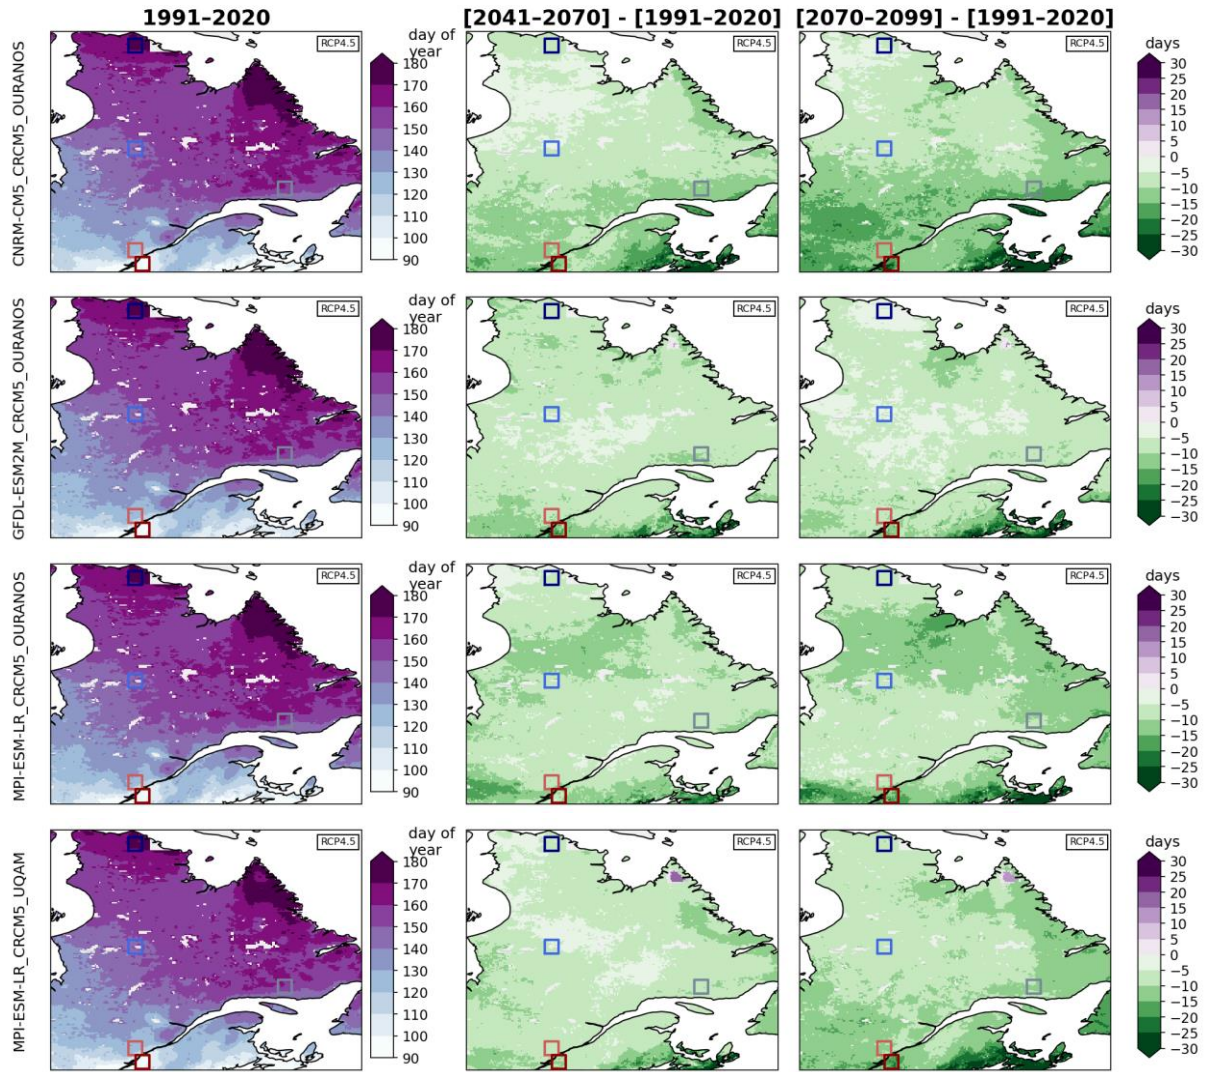

Fig. S18 Annual snow season end for 1991–2020 (left column), and differences between the 1991–2020 period and 2041–2070 (centre column) or 2070–2099 (right column). Results are presented for each simulation (row) of the RCP4.5 ensemble.

## Snow season end

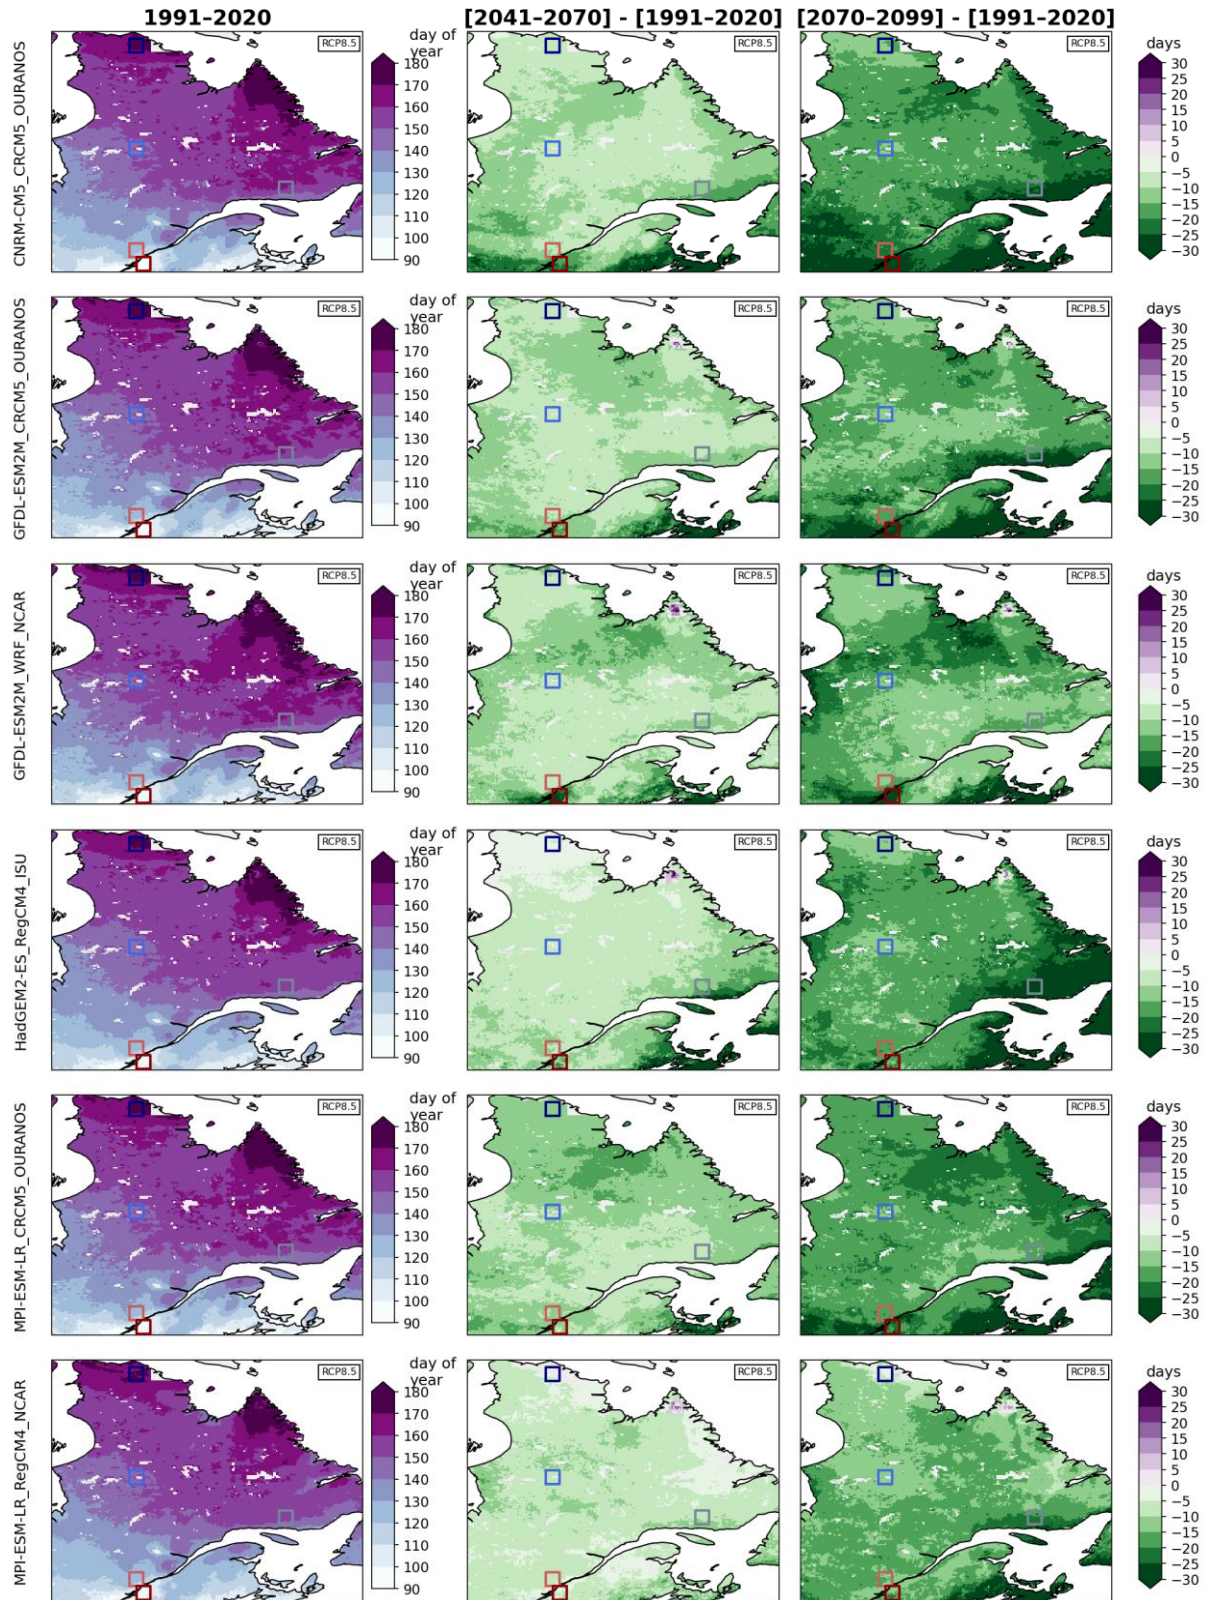

Fig. S19 Annual snow season end for 1991–2020 (left column), and differences between the 1991–2020 period and 2041–2070 (centre column) or 2070–2099 (right column). Results are presented for each simulation (row) of the RCP8.5 ensemble.

Table S1 Ensemble of simulations considered in this paper marked as X; selected simulations are marked with X.



[illegible]
